# Supplementary material for: Anthocidins A–D, New 5-Hydroxyanthranilic Acid Related Metabolites from the Sea Urchin-Associated Actinobacterium, Streptomyces sp. HDa1
Source: MDPI journal article supplement (doi:10.3390/molecules23051032), 2018-04-27

# Supporting Information

## **Anthocidins A-D, New 5-Hydroxyanthranilic Acid Related Metabolites from the Sea Urchin-Associated Actinobacterium, *Streptomyces* sp. HDa1**

Figure S1.  $^1\text{H}$ -NMR (600 MHz,  $\text{CDCl}_3$ ) spectrum of compound **1**

Figure S2.  $^{13}\text{C}$ -NMR (150 MHz,  $\text{CDCl}_3$ ) spectrum of compound **1**

Figure S3. DEPT135 spectrum of compound **1** in  $\text{CDCl}_3$

Figure S4. HSQC spectrum of compound **1** in  $\text{CDCl}_3$

Figure S5.  $^1\text{H}$ - $^1\text{H}$  COSY spectrum of compound **1** in  $\text{CDCl}_3$

Figure S6. HMBC spectrum of compound **1** in  $\text{CDCl}_3$

Figure S7.  $^1\text{H}$ -NMR (600 MHz,  $\text{CDCl}_3$ ) spectrum of compound **2**

Figure S8.  $^{13}\text{C}$ -NMR (150 MHz,  $\text{CDCl}_3$ ) spectrum of compound **2**

Figure S9. DEPT135 spectrum of compound **2** in  $\text{CDCl}_3$

Figure S10. HSQC spectrum of compound **2** in  $\text{CDCl}_3$

Figure S11.  $^1\text{H}$ - $^1\text{H}$  COSY spectrum of compound **2** in  $\text{CDCl}_3$

Figure S12. HMBC spectrum of compound **2** in  $\text{CDCl}_3$

Figure S13.  $^1\text{H}$ -NMR (600 MHz,  $\text{CDCl}_3$ ) spectrum of compound **3**

Figure S14.  $^{13}\text{C}$ -NMR (150 MHz,  $\text{CDCl}_3$ ) spectrum of compound **3**

Figure S15. HSQC spectrum of compound **3** in  $\text{CDCl}_3$

Figure S16.  $^1\text{H}$ -NMR (600 MHz,  $\text{CDCl}_3$ ) spectrum of compound **4**

Figure S17.  $^{13}\text{C}$ -NMR (150 MHz,  $\text{CDCl}_3$ ) spectrum of compound **4**

Figure S18. DEPT135 spectrum of compound **4** in  $\text{CDCl}_3$

Figure S19. HSQC spectrum of compound **4** in  $\text{CDCl}_3$

Figure S20.  $^1\text{H}$ - $^1\text{H}$  COSY spectrum of compound **4** in  $\text{CDCl}_3$

Figure S21. HMBC spectrum of compound **4** in  $\text{CDCl}_3$

Figure S1.  $^1\text{H}$ -NMR (600 MHz,  $\text{CDCl}_3$ ) spectrum of compound **1**

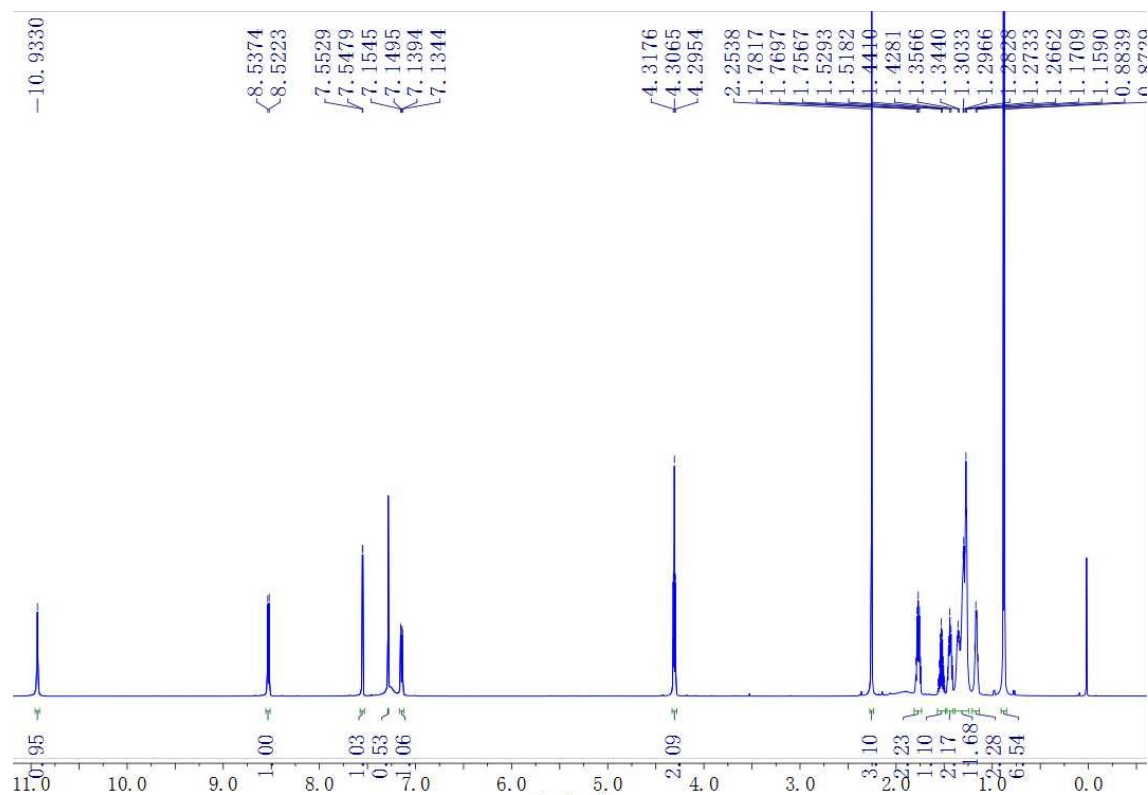

Figure S2.  $^{13}\text{C}$ -NMR (150 MHz,  $\text{CDCl}_3$ ) spectrum of compound **1**

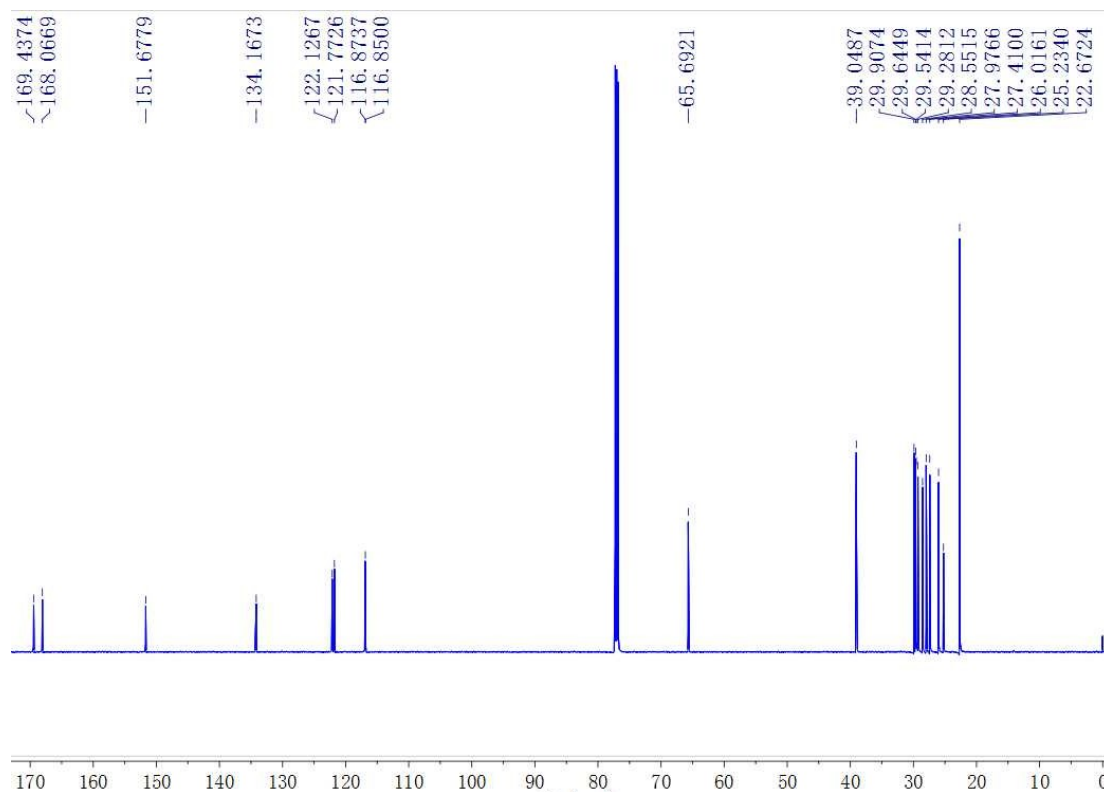

Figure S3. DEPT135 spectrum of compound **1** in CDCl<sub>3</sub>

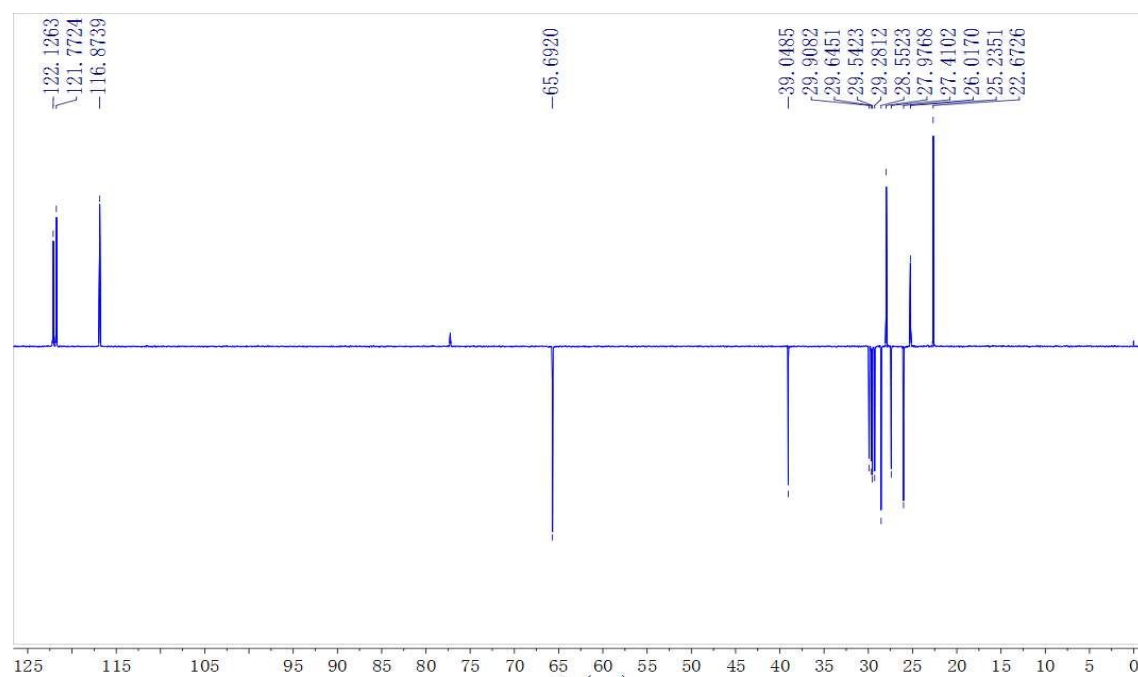

Figure S4. HSQC spectrum of compound **1** in CDCl<sub>3</sub>

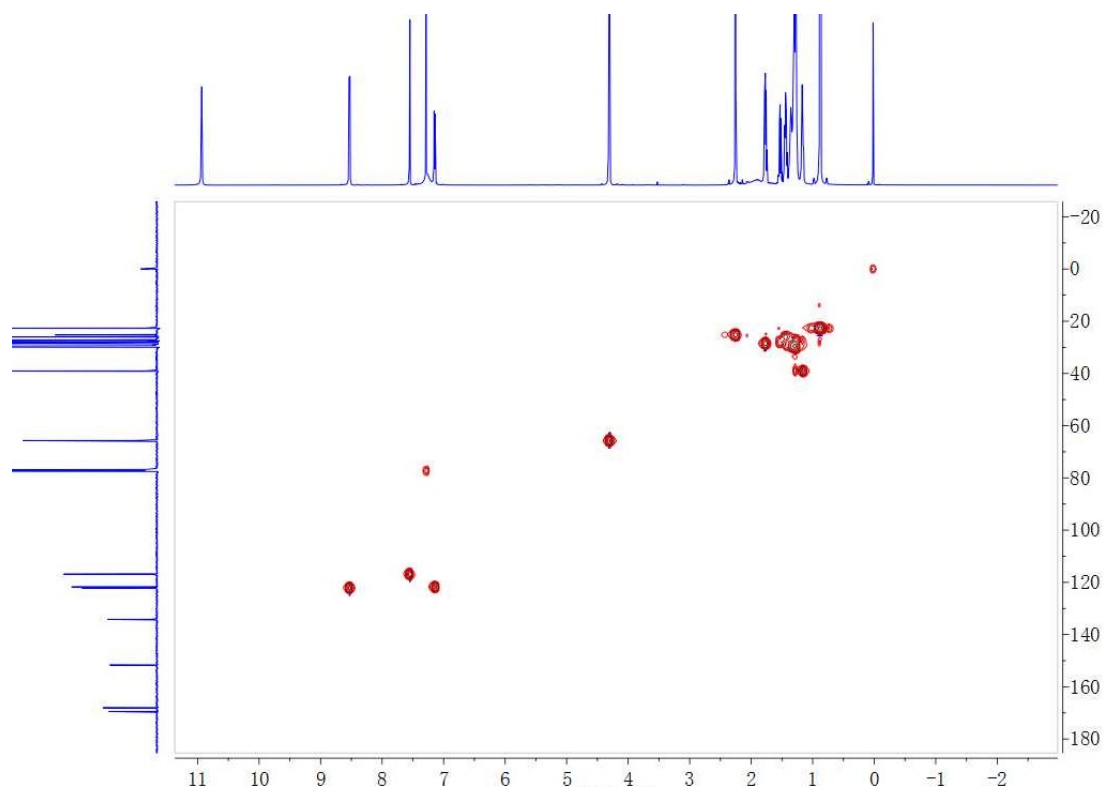

Figure S5.  $^1\text{H}$ - $^1\text{H}$  COSY spectrum of compound **1** in  $\text{CDCl}_3$

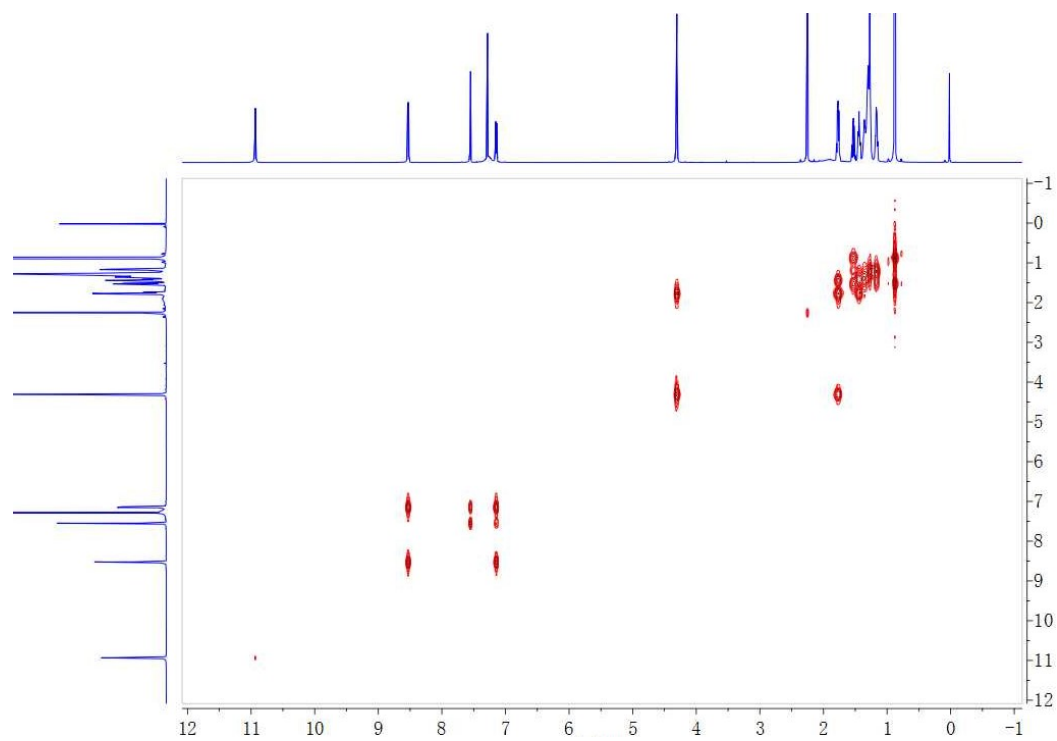

Figure S6. HMBC spectrum of compound **1** in  $\text{CDCl}_3$

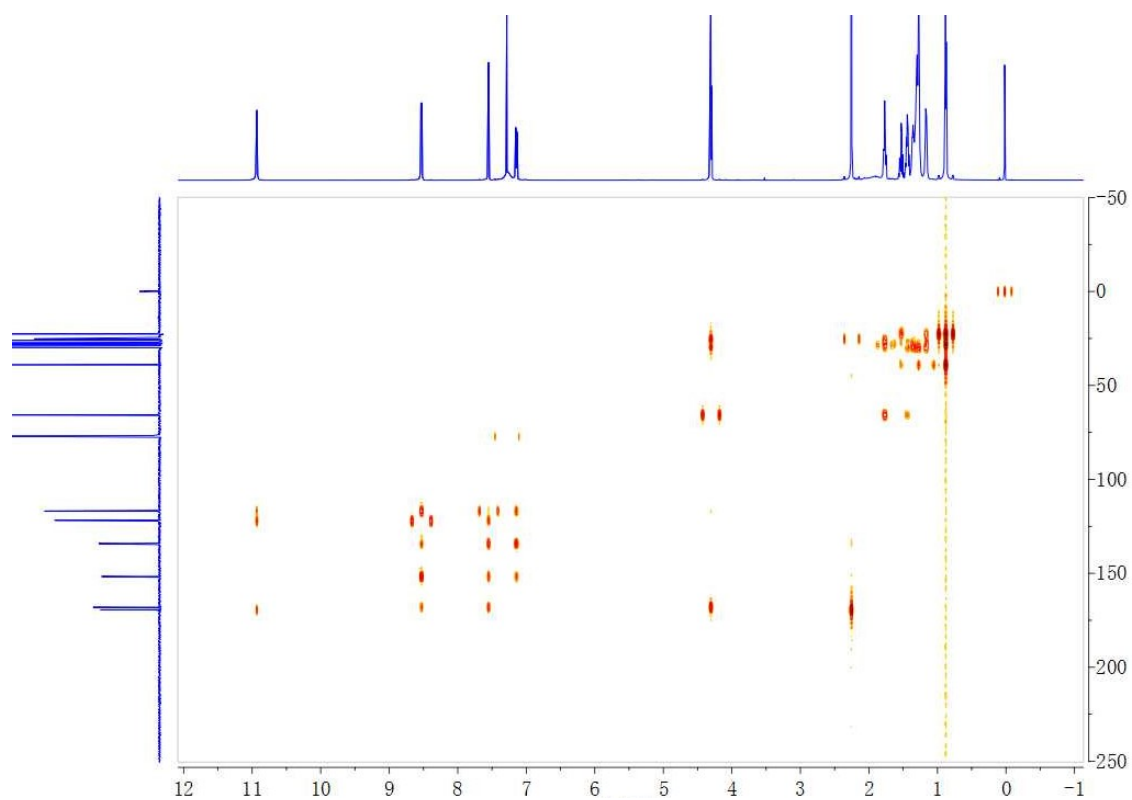

Figure S7.  $^1\text{H}$ -NMR (600 MHz,  $\text{CDCl}_3$ ) spectrum of compound 2

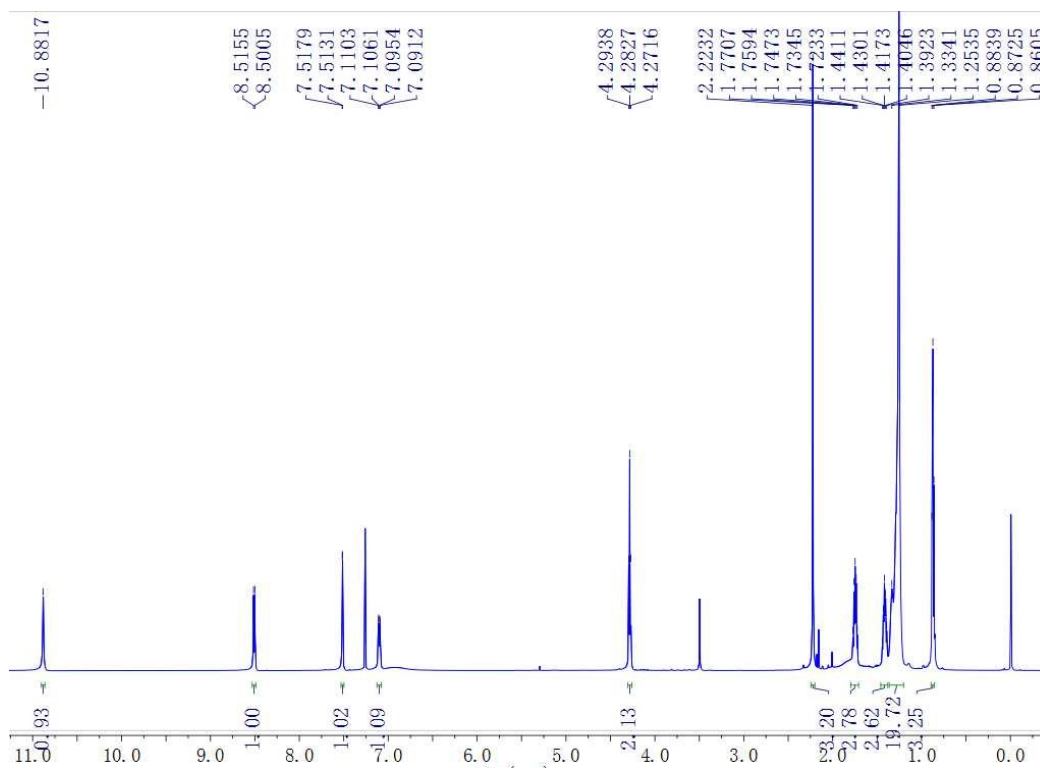

Figure S8.  $^{13}\text{C}$ -NMR (150 MHz,  $\text{CDCl}_3$ ) spectrum of compound 2

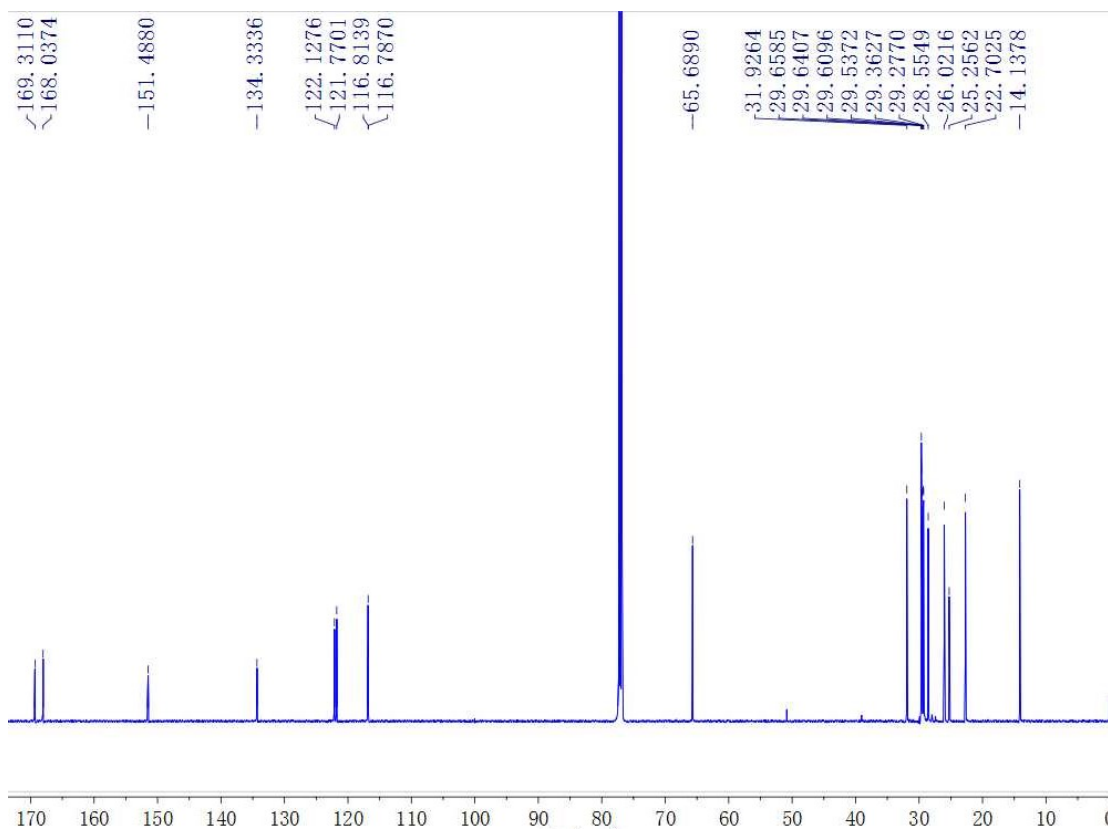

Figure S9. DEPT135 spectrum of compound **2** in CDCl<sub>3</sub>

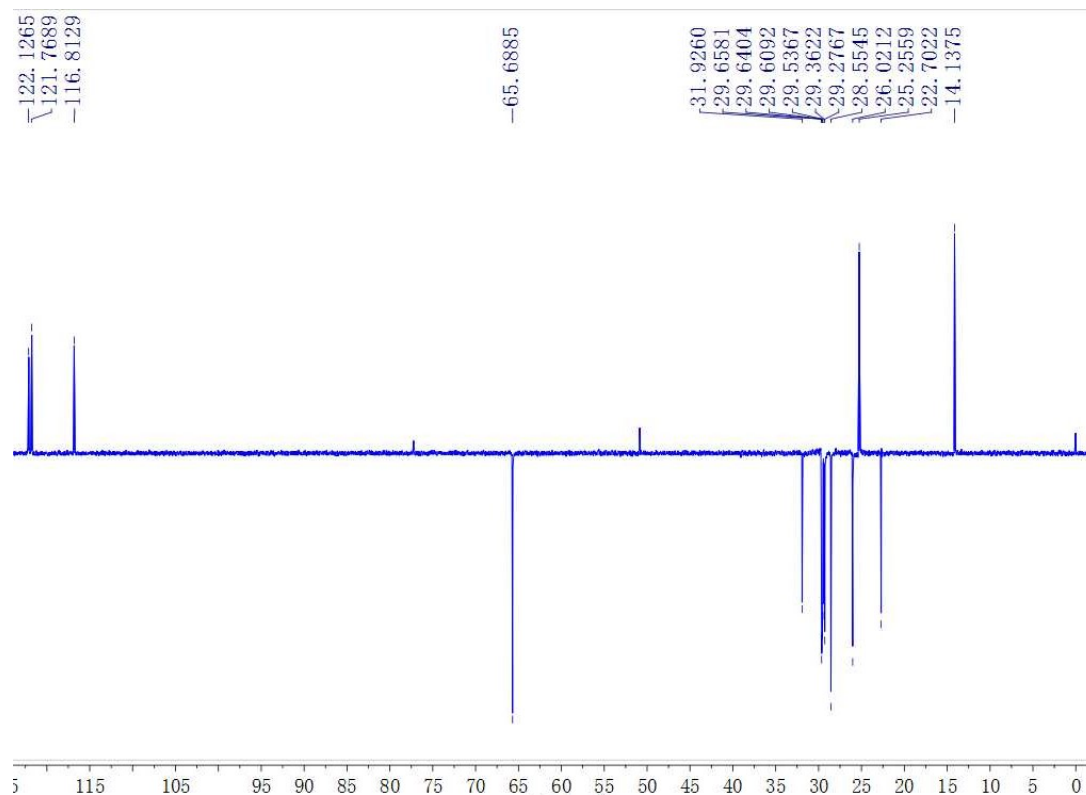

Figure S10. HSQC spectrum of compound **2** in CDCl<sub>3</sub>

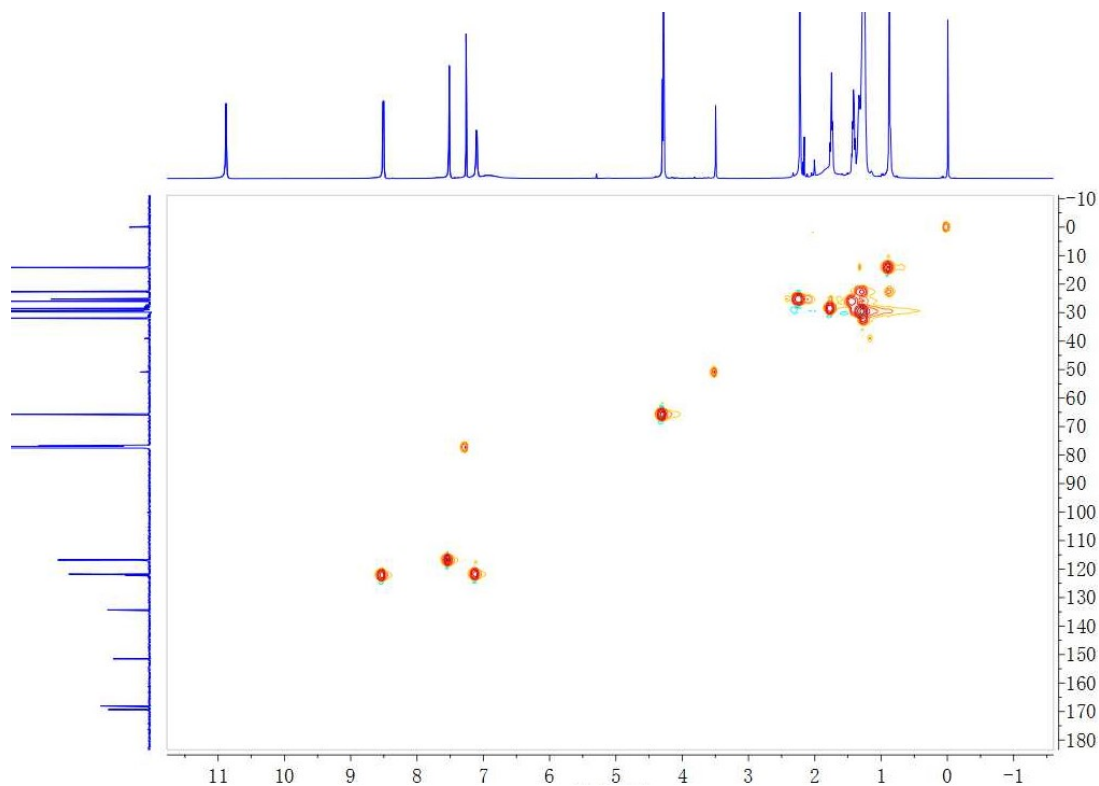

Figure S11.  $^1\text{H}$ - $^1\text{H}$  COSY spectrum of compound **2** in  $\text{CDCl}_3$

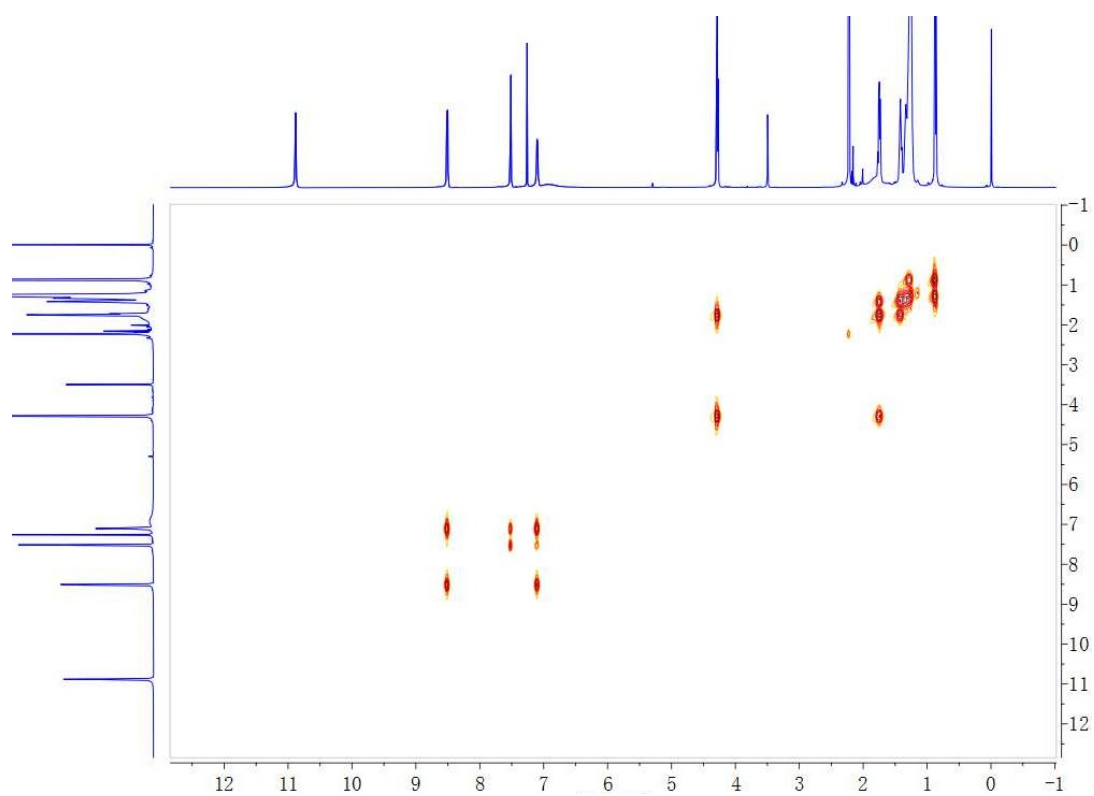

Figure S12. HMBC spectrum of compound **2** in  $\text{CDCl}_3$

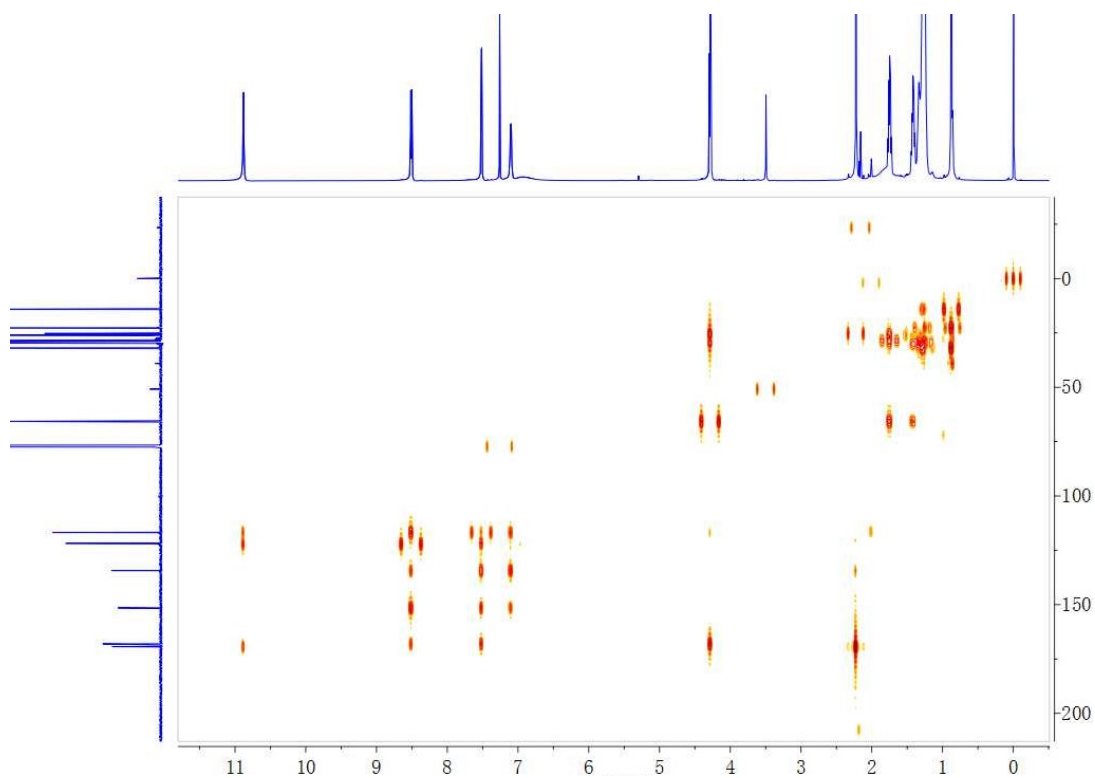

Figure S13.  $^1\text{H}$ -NMR (600 MHz,  $\text{CDCl}_3$ ) spectrum of compound **3**

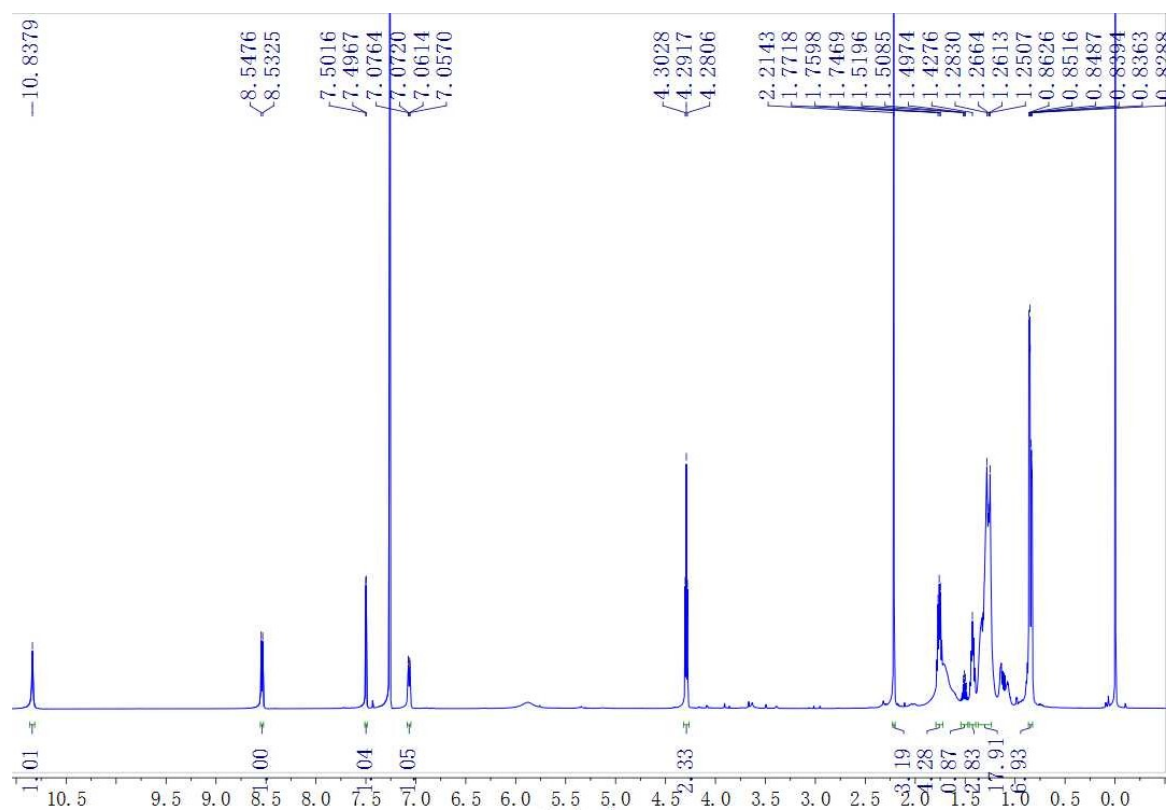

Figure S14.  $^{13}\text{C}$ -NMR (150 MHz,  $\text{CDCl}_3$ ) spectrum of compound **3**

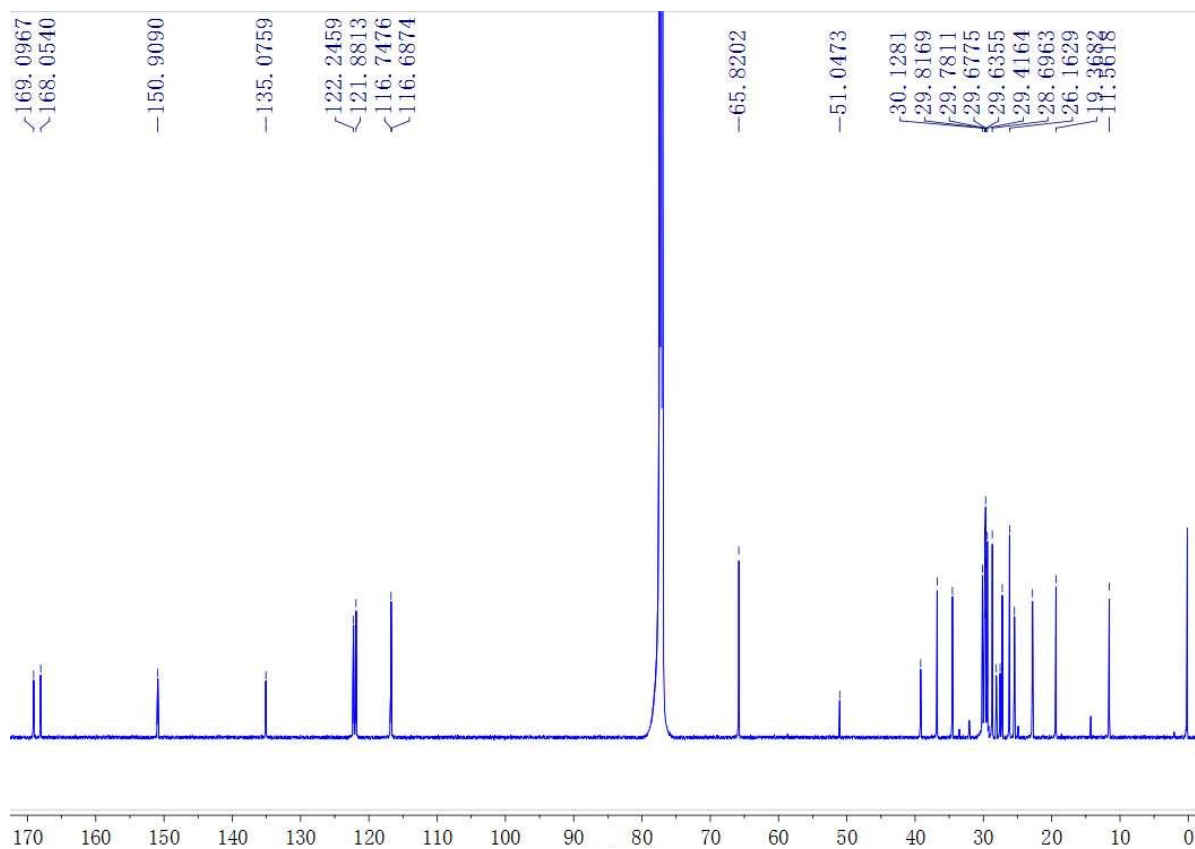



Figure S15. HSQC spectrum of compound **3** in CDCl<sub>3</sub>

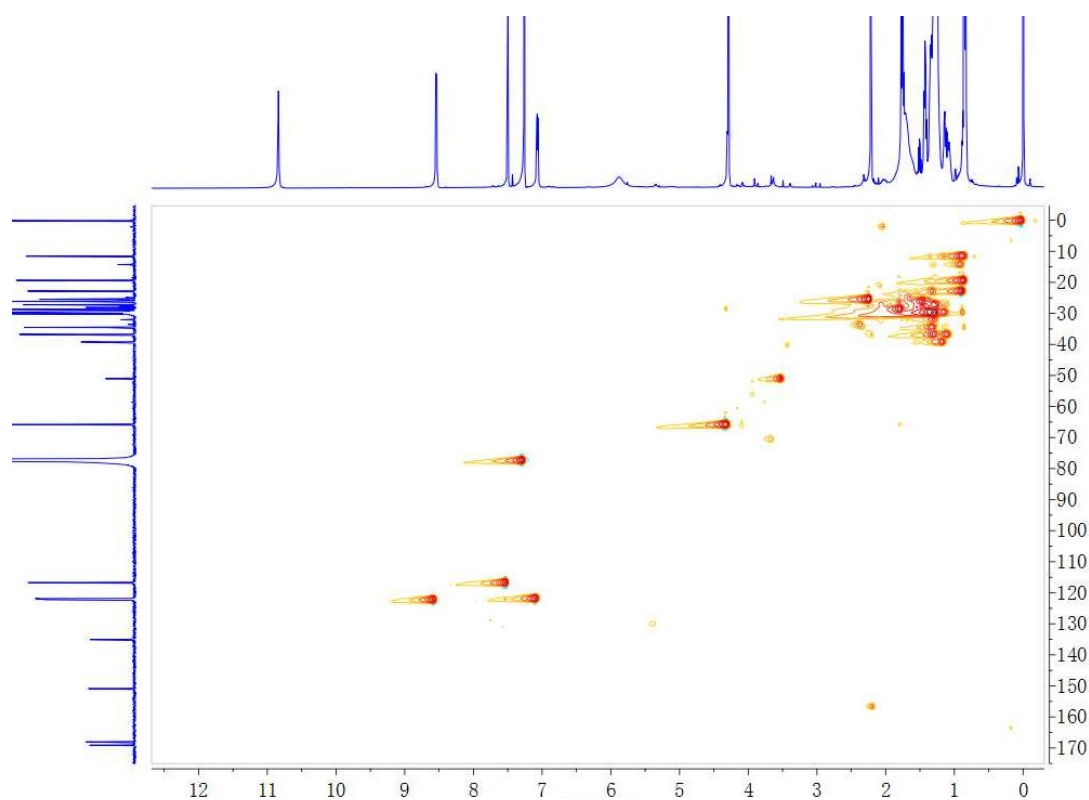

Figure S16. <sup>1</sup>H-NMR (600 MHz, CDCl<sub>3</sub>) spectrum of compound **4**

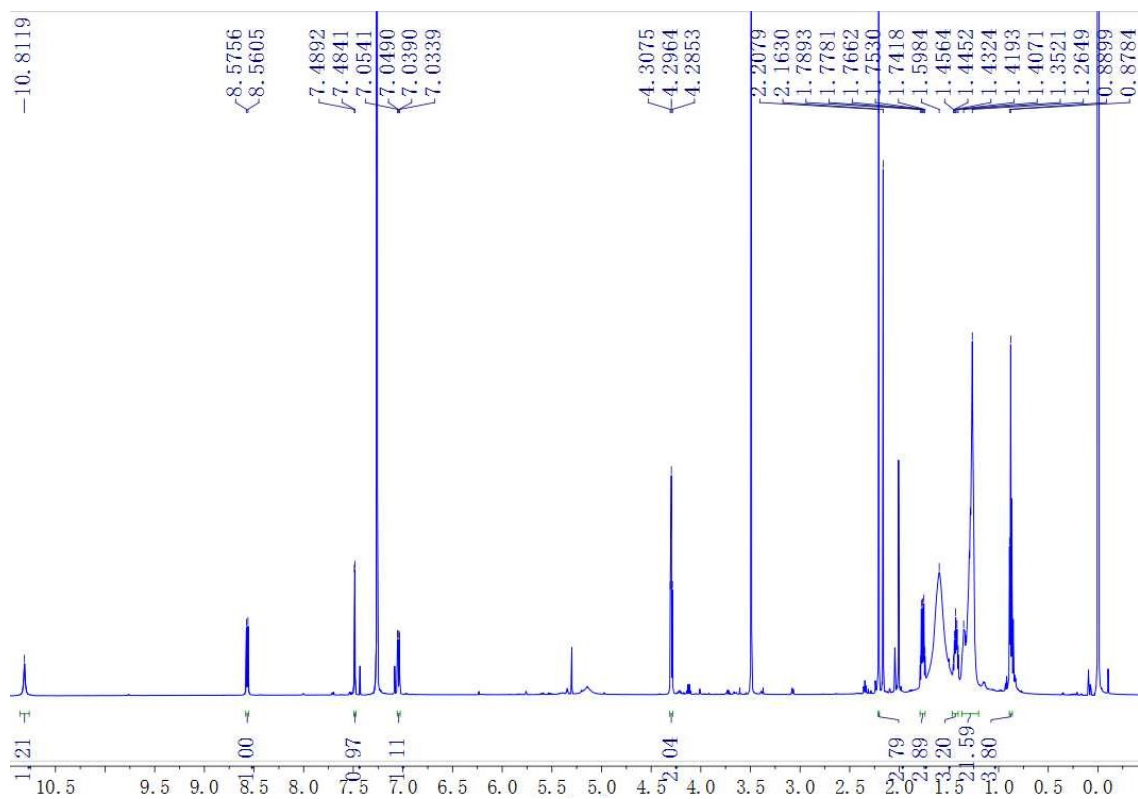

Figure S17.  $^{13}\text{C}$ -NMR (150 MHz,  $\text{CDCl}_3$ ) spectrum of compound **4**

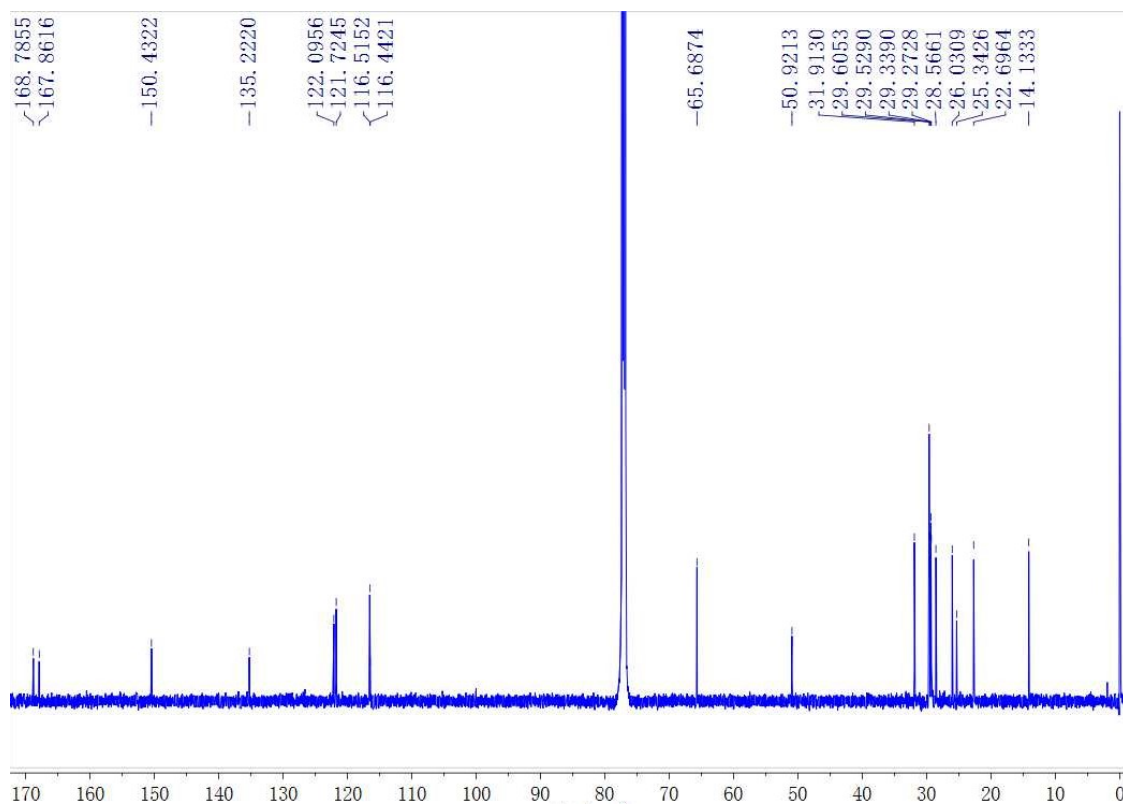

Figure S18. DEPT135 spectrum of compound **4** in  $\text{CDCl}_3$

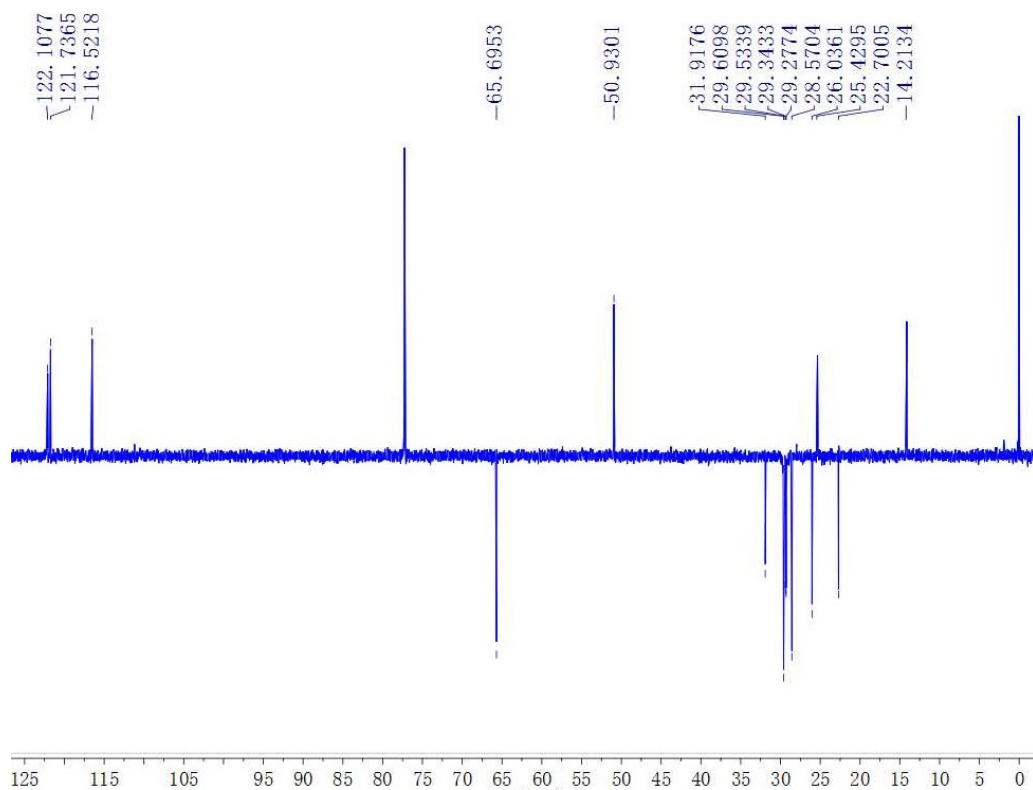

Figure S19. HSQC spectrum of compound **4** in CDCl<sub>3</sub>

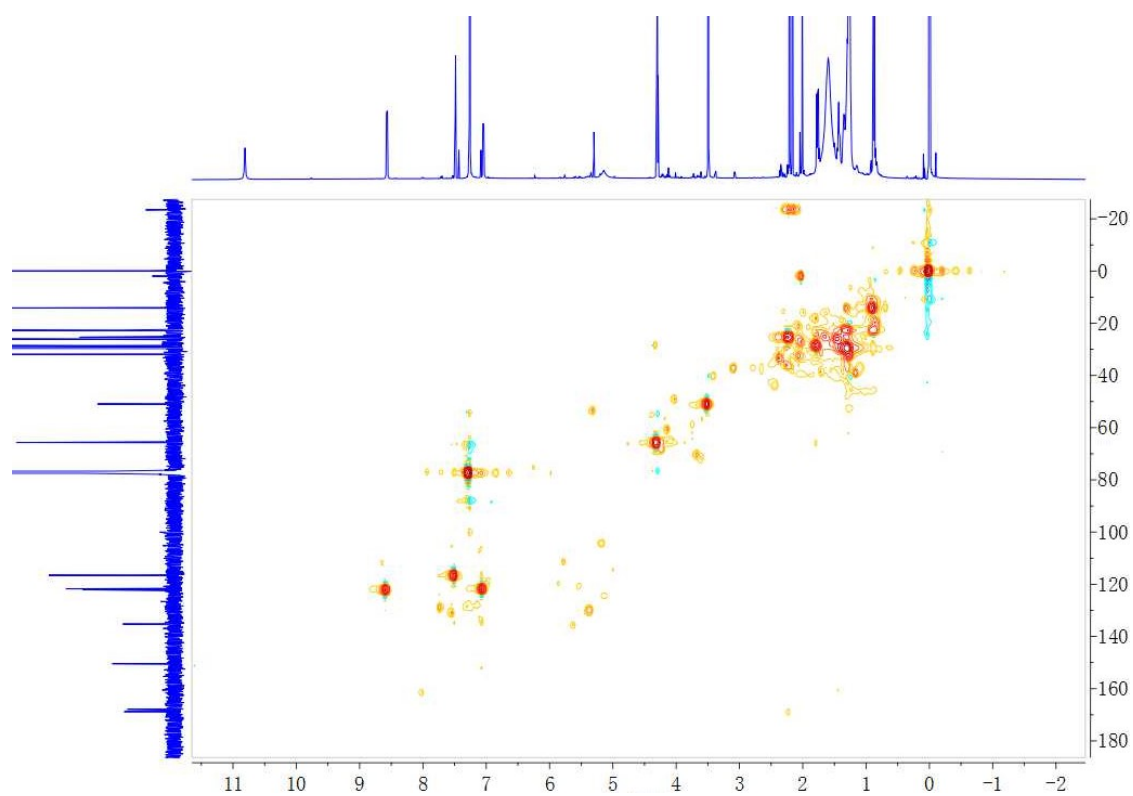

Figure S20. <sup>1</sup>H-<sup>1</sup>H COSY spectrum of compound **4** in CDCl<sub>3</sub>

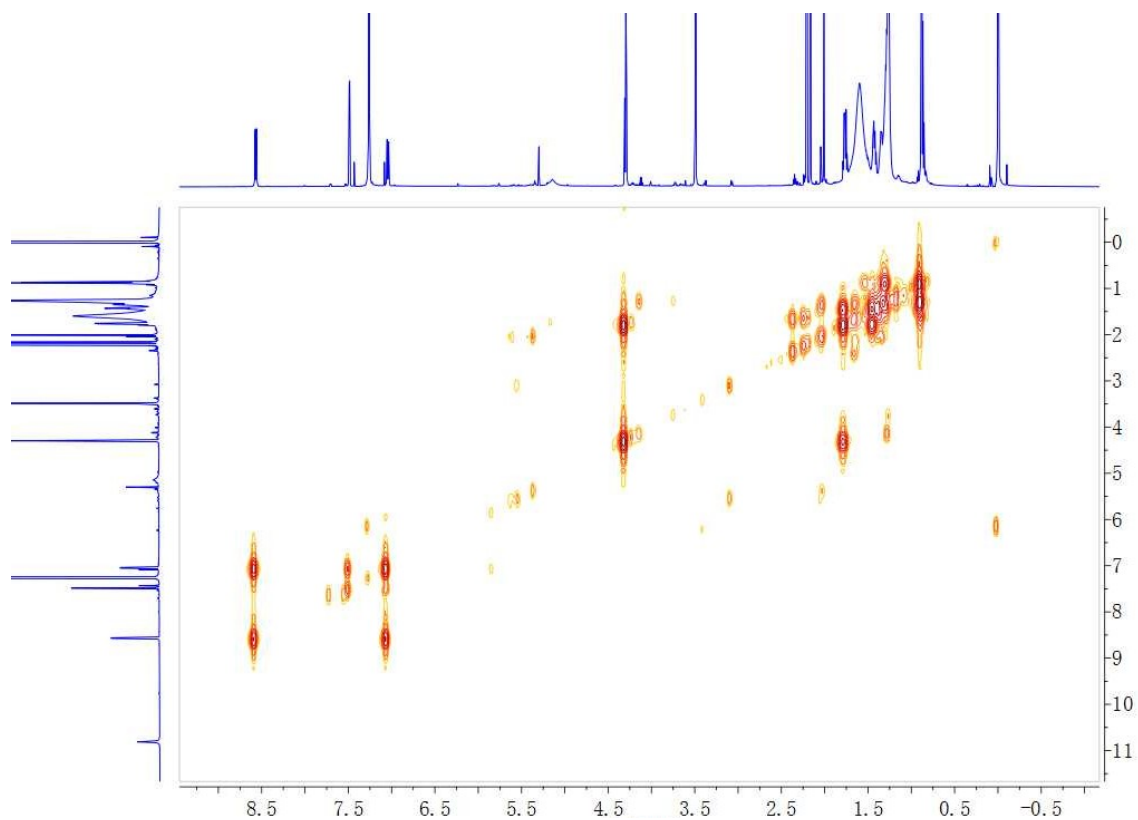

Figure S21. HMBC spectrum of compound **4** in CDCl<sub>3</sub>

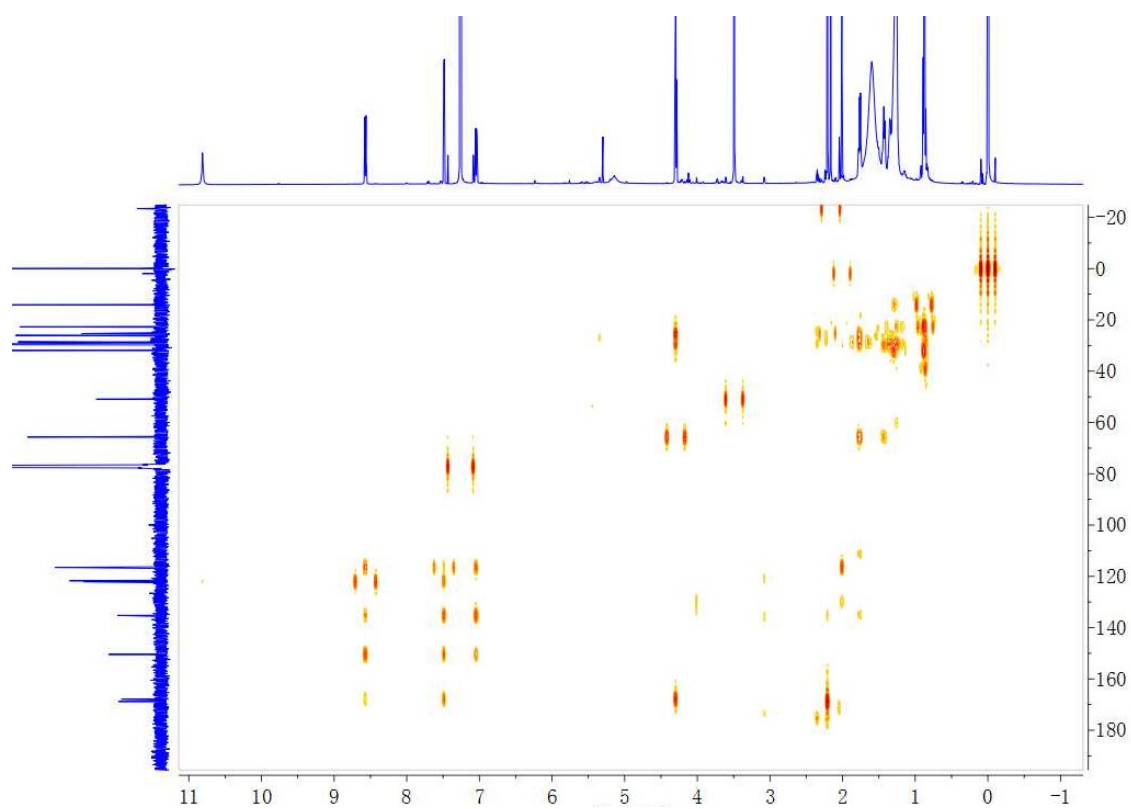

Supplement: s1 [file s1]
